# Supplementary material
Source: publisher site journal article supplement (https://www.dovepress.com/article/358008)
Supplement: Supplementary file 1 [file get_supplementary_file.php]

**Supplementary table1 Antibodies in this study.**

| **Antibodies against** | **Company** | **Catalog number** |
| --- | --- | --- |
| CDKN3 | Abcam | ab175393 |
| LDHA  PKM2 | CST  CST | 3582T  4053S |
| HK2 | Proteintech | 66974-1-Ig |
| GLUT1 | Proteintech | 21829-1-AP |
| BAX | CST | 2772S |
| BCL2 | Abcam | ab182858 |

**Abbreviations:**

Cyclin-dependent kinase inhibitor 3 (CDKN3)

Lactate dehydrogenase A (LDHA)

Pyruvate kinase muscle isoform 2 (PKM2)

Hexokinase-2 (HK2)

Glucose transporter 1 (GLUT1)

B cell lymphoma 2 associated X (BAX)

B cell lymphoma 2 (BCL2)
